# Supplementary material for: The Roles of Celiac Trunk Angle and Vertebral Origin in Median Arcuate Ligament Syndrome
Source: Diagnostics (Basel). 2020 Jan 31;10(2):76. doi: 10.3390/diagnostics10020076 (PMC7168915; doi:10.3390/diagnostics10020076)
Supplement: Supplementary file 1 [file diagnostics-10-00076-s001.xlsx]

## Sheet: Sheet2
Cadaver #	Gender	Age	Origin of Celiac Artery	Origin of SMA	Origin celiac coded (1=T11, 2= T12, 3= L1)	Origin SMA Coded (1=T12, 2=L1, 3=L2)	Distance between Celiac Artery and MAL- external	Distance between Celiac Artery and SMA- external	Diameter of Celiac Artery- External	Angle of Origination for Celiac	Angles of Origination for SMA	MAL Compression Bimodal (0= No, 1= Yes)	MAL Comp (0= None, 1= Some possible; 2= Yes)
1	F	63	T11	T12	1	1	1.97	13.03	7.46	43	62	0	0
2	F	65	L1	L2	3	3	10.31	16.76	6.56	82	65	0	0
3	F	86	T12	L1	2	2	17.82	20.22	4.9	90	87	0	0
4	F	74	T12	L1	2	2	2.73	12.34	8.59	50	87	0	0
5	F	65	L1	L2	3	3	1.13	13.55	6.33	33	84	0	1
6	F	86	L1	L1	3	2	54	2	9	70	60	0	0
7	F	64	T12	T12	2	1	0	4	10	85	90	0	1
8	F	87	L1	L1	3	2	2	3	8	80	60	0	1
9	F	76	T12	L1	2	2	6	4	8	80	50	0	0
10	F	90	T12	T12	2	1	16	10	9	80	80	0	0
11	F	82	T11	L1	1	2	-5.42	13.2	9.35	18	20	1	2
12	F	89	T12	L1	2	2	-4.29	14.62	7.84	35	68	1	2
13	F	79	L1	L2	3	3	-3.88	18.04	6.05	23	36	1	2
14	F	57	T11	T12	1	1	-4.38	18.41	5.14	20	83	1	2
15	F	87	T12	T12	2	1	-6	7	11	75	30	1	2
16	F	89	L1	L2	3	3	-3	17	8	50	20	1	2
17	F	88	T12	T12	2	1	-1	3	9	70	30	1	2
18	F	93	T12	T12	2	1	-2	11	9	70	40	1	2
19	M	82	T12	L1	2	2	5.28	16.19	9.29	91	78	0	2
20	M	77	T11	T12	1	1	1.53	12.15	7.1	32	20	0	1
21	M	62	L1	L1	3	2	-1.81	9.2	6.96	42	79	0	1
22	M	53	T12	L1	2	2	-3.47	14.9	7.74	34	46	0	1
23	M	60	T11	L1	1	2	21.64	27.5	6.61	90	90	0	0
24	M	87	T11	T12	1	1	53	12	12	85	70	0	0
25	M	83	L1	L1	3	2	69	9	12	90	50	0	0
26	M	88	T12	T12	2	1	3	6	10	80	80	0	1
27	M	90	L1	L1	3	2	5	7	12	80	40	0	0
28	M	91	T12	L1	2	2	4	11	11	90	80	0	0
29	M	74	T12	T12	2	1	-2	8	7	70	60	0	1
30	M	88	T12	T12	2	1	3	6	8	90	50	0	0
31	M	74	T12	L1	2	2	-2	6	12	90	80	0	1
32	M	86	T11	T12	1	1	-2	10	10	80	70	0	1
33	M	63	T12	T12	2	1	-0.453	3.41	5.97	12	32	1	2
34	M	80	L1	L2	3	3	-3	10	7	90	65	1	2
35	M	51	T12	T12	2	1	-3	2	7	80	15	1	2
MEAN					2.08571	1.71429	6.56306	10.6149	8.42543	65.1429	58.7714
